# Supplementary material
Source: Springer Nature journal article supplement (https://www.springermedizin.de/resource/supplementary/12888_2013_1454_MOESM6_ESM.pdf/9480330)
Supplement: MOESM6 [file 9480330]

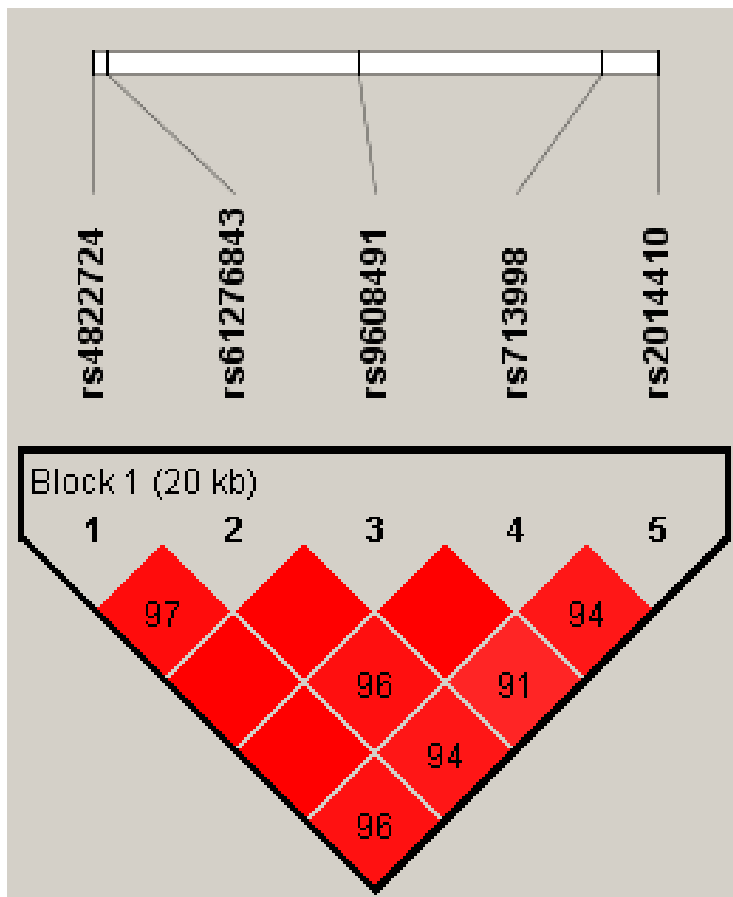

**$D'$**

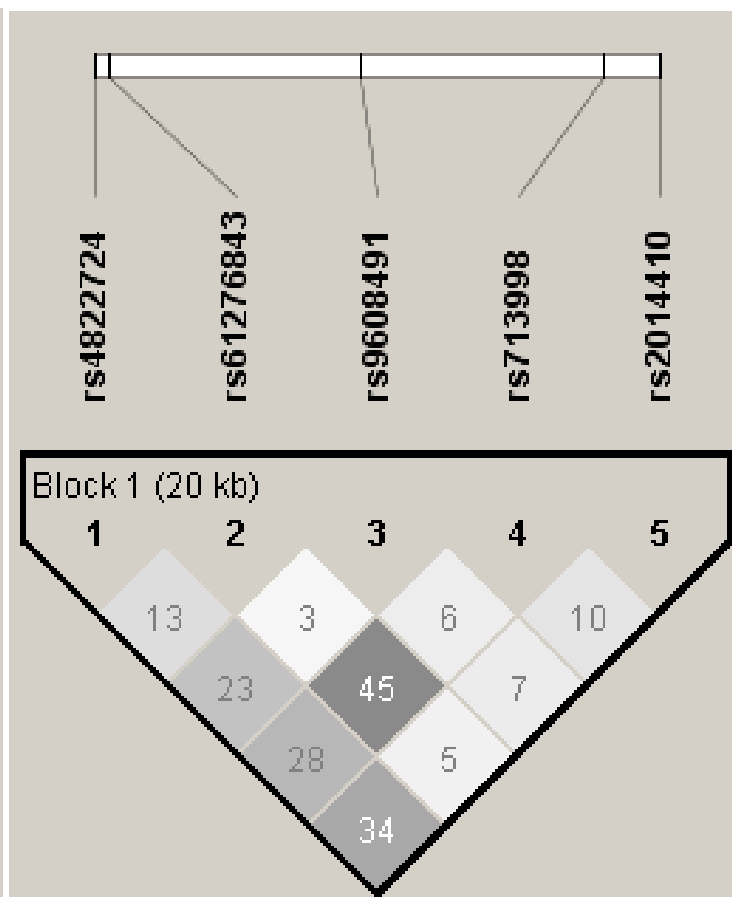

**$r^2$**
